# Supplementary material for: Longitudinal Evolution of the Pseudomonas-Derived Cephalosporinase (PDC) Structure and Activity in a Cystic Fibrosis Patient Treated with β-Lactams
Source: PubMed Central journal article supplement (PMC9600753; doi:10.1128/mbio.01663-22), 2022-09-08
Supplement: mbio.01663-22-s0003.pdf [file mbio.01663-22-s0003.pdf]

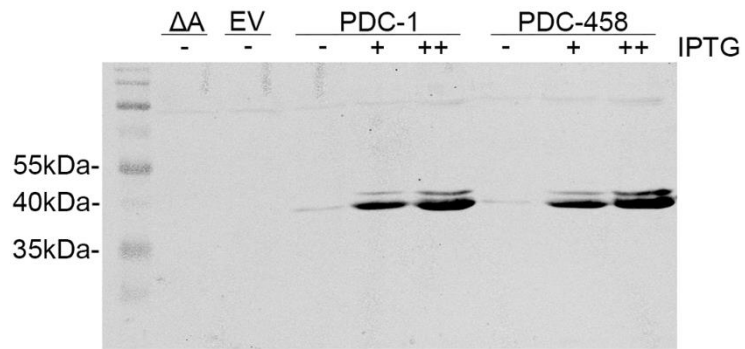

**Fig. S3. Representative Western Blot showing the controlled expression of PDC variants PDC-1 and PDC-458.**

Entire cell extracts of strain PA $\Delta A$  expressing either strep-tagged PDC-1 or PDC-458 were used for Western blotting by using specific antibodies against strep-tag. Overnight bacterial cultures were induced with IPTG 10  $\mu$ M (+), 20  $\mu$ M (++) , or grown without IPTG (-). Cell extracts of PA $\Delta A$  transformed with the empty vector (EV) pMBLe or with no vector at all ( $\Delta A$ ) were used as negative controls.
