# Supplementary material for: Longitudinal Evolution of the Pseudomonas-Derived Cephalosporinase (PDC) Structure and Activity in a Cystic Fibrosis Patient Treated with β-Lactams
Source: PubMed Central journal article supplement (PMC9600753; doi:10.1128/mbio.01663-22), 2022-09-08
Supplement: mbio.01663-22-s0004.pdf [file mbio.01663-22-s0004.pdf]

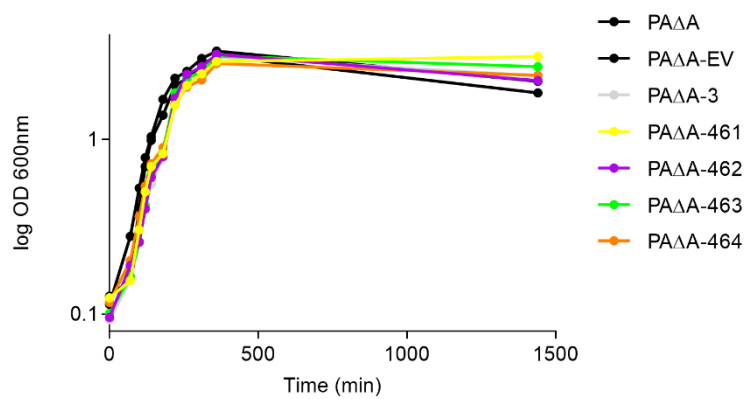

**Fig. S4. Growth curves of PAAΔA expressing each of PDC variants.**

Strains were growth in LB broth supplemented with IPTG 10  $\mu$ M at 37°C for 16hs.

Experiments were performed in duplicates and mean values are shown. No significant differences were observed therefore error bars are omitted for clarity.
